# Supplementary material
Source: ML conference proceedings conference paper supplement (https://openaccess.thecvf.com/content/CVPR2025/html/Ye_PO3AD_Predicting_Point_CVPR_2025_paper.html)
Supplement: Supplementary file 1 [file Ye_PO3AD_Predicting_Point_CVPR_2025_supplemental.pdf]

# PO3AD: Predicting Point Offsets toward Better 3D Point Cloud Anomaly Detection

## Supplementary Material

### 6. Visualizations of Our Pseudo Anomalies

Figure 8 presents visualizations of normal, real anomaly, and our pseudo anomaly samples. It is observed that the pseudo anomalies generated using the Norm-AS method closely resemble real anomalies, thereby supporting the efficacy of our approach in creating credible pseudo anomaly instances.

Faster Stronger. In *IEEE/CVF Conference on Computer Vision and Pattern Recognition*, pages 4840–4851, 2024.

### 7. Additional Experimental Results

#### Object-level AUC-PR results on Anomaly-ShapeNet.

Table 5 presents the results of our comparative analysis of object-level AUC-PR on the Anomaly-ShapeNet dataset. The results indicate that our method achieves the best mean rank and significantly outperforms the second-best method by an average of 26.0% AUC-PR. Such experimental results evidence the superiority of our method.

**Results of using PTv3 [46] as backbone.** Ten categories are selected to conduct experiments using PTv3 as the backbone, results are presented in Table 6. Applying PTv3 as the backbone for feature extraction, our method still outperforms R3D-AD, validating the effectiveness of our offset prediction strategy.

Table 7 presents the point-level AUC-PR results of our method on the Anomaly-ShapeNet dataset.

Table 8 exhibits the point-level AUC-ROC results of our method and competing methods on the Real3D-AD dataset.

Table 9 reports the ablation study on full categories of the Anomaly-ShapeNet dataset.

### 8. Visualizations of Noisy Data

Figure 9 depicts the visualizations of a clean point cloud and its noisy variants with various standard deviations. It is observed that as the noise standard deviation grows, the point cloud surface becomes progressively less smooth.

### 9. Visualizations of Model Attention Maps

Visualizations of model attention maps are presented in Figure 10. Evidently, our method successfully focuses on pseudo-abnormal regions, allowing the effective extraction of normal representations for anomaly detection.

### References

- [46] Xiaoyang Wu, Li Jiang, Peng-Shuai Wang, Zhijian Liu, Xihui Liu, Yu Qiao, Wanli Ouyang, Tong He, and Hengshuang Zhao. Point Transformer V3: Simpler

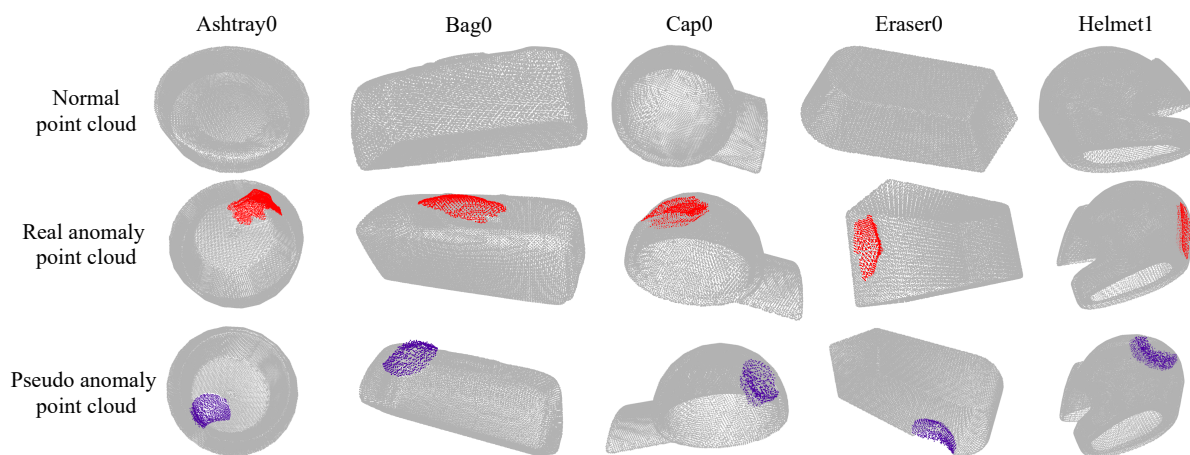

Figure 8. Visualizations of normal, real anomaly, and our pseudo anomaly samples.

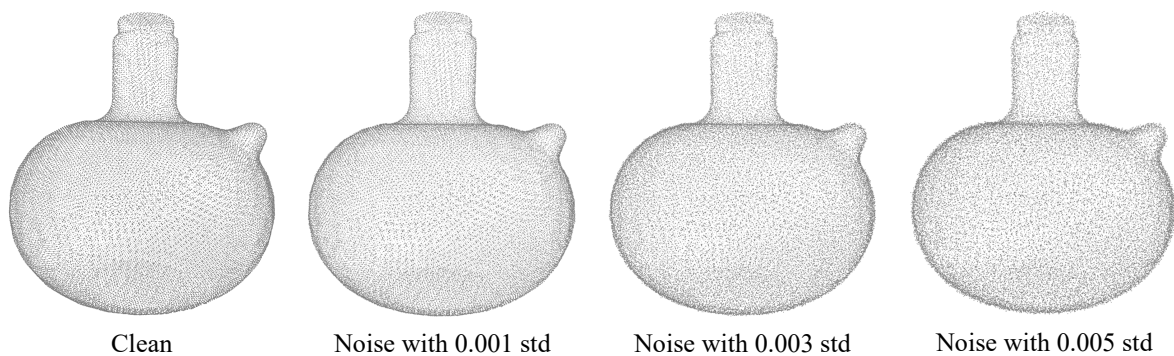

Figure 9. Visualizations of clean, and noisy point clouds with various standard deviations (std).

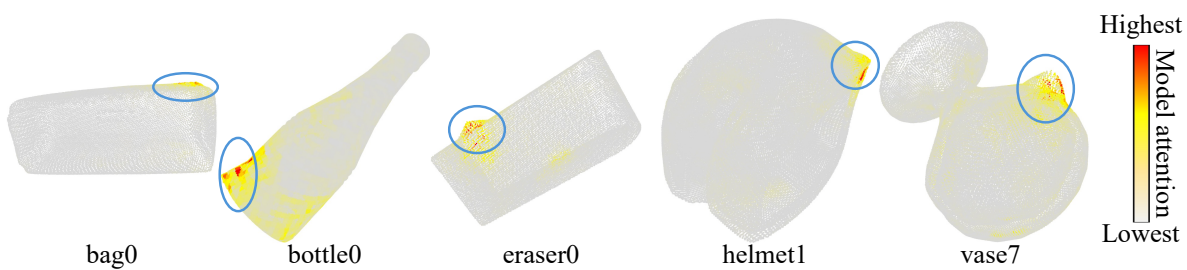

Figure 10. Visualization of model attention maps, pseudo-abnormal regions are marked with blue circles.

| Method                      | ashtray0    | bag0        | bottle0     | bottle1     | bottle3     | bow10       | bow11       | bow12       | bow13       | bow14       | bow15       | bucket0     | bucket1     | cap0        |
|-----------------------------|-------------|-------------|-------------|-------------|-------------|-------------|-------------|-------------|-------------|-------------|-------------|-------------|-------------|-------------|
| BTF (Raw) (CVPR 23')        | 57.8        | 45.8        | 46.6        | 57.3        | 54.3        | 58.8        | 46.4        | 57.6        | 65.4        | 60.1        | 61.5        | 65.2        | 62.0        | 65.9        |
| BTF (FPFH)                  | 65.1        | 55.1        | 64.4        | 62.5        | 60.2        | 57.6        | <u>64.8</u> | 51.5        | 49.9        | 63.2        | <u>69.9</u> | 48.3        | 64.8        | 61.8        |
| M3DM (CVPR 23')             | 63.2        | 64.2        | <u>76.3</u> | 67.4        | 45.1        | 52.5        | 51.5        | 63.0        | 63.5        | 57.1        | 60.1        | 60.9        | 50.7        | 56.4        |
| PatchCore (FPFH) (CVPR 22') | 44.5        | 60.8        | <u>61.5</u> | 67.7        | 57.9        | 54.8        | 54.5        | 61.1        | 62.0        | 57.5        | 54.1        | 60.4        | 56.5        | 58.5        |
| PatchCore (PointMAE)        | <u>67.9</u> | 60.1        | 54.5        | 64.5        | <u>65.1</u> | 56.2        | 61.1        | 45.6        | 55.6        | 60.1        | 58.5        | 54.1        | 64.2        | 56.1        |
| CPMF (PR 24')               | 45.3        | 65.5        | 58.8        | 59.2        | 50.5        | <u>77.5</u> | 62.1        | 60.1        | 41.8        | <u>68.3</u> | 68.5        | <u>66.2</u> | 50.1        | 60.1        |
| Reg3D-AD (NeurIPS 23')      | 58.8        | 60.8        | 63.2        | 69.5        | 47.4        | 49.4        | 51.5        | 49.5        | 44.1        | 62.4        | 55.5        | 63.2        | 71.4        | 69.3        |
| IMRNet (CVPR 24')           | 61.2        | <u>66.5</u> | 55.8        | <u>70.2</u> | 64.8        | 48.1        | 50.4        | <u>68.1</u> | 61.4        | 63.0        | 65.2        | 57.8        | <u>73.2</u> | <u>71.1</u> |
| Ours                        | <b>99.9</b> | <b>80.9</b> | <b>92.7</b> | <b>95.9</b> | <b>96.2</b> | <b>94.6</b> | <b>90.5</b> | <b>88.8</b> | <b>92.7</b> | <b>98.5</b> | <b>90.4</b> | <b>92.3</b> | <b>88.2</b> | <b>84.1</b> |

  

| Method                      | cap3        | cap4        | cap5        | cup0        | cup1        | eraser0     | headset0    | headset1    | helmet0     | helmet1     | helmet2     | helmet3     | jar0        | micro.      |
|-----------------------------|-------------|-------------|-------------|-------------|-------------|-------------|-------------|-------------|-------------|-------------|-------------|-------------|-------------|-------------|
| BTF (Raw) (CVPR 23')        | 61.2        | 51.5        | 65.3        | 60.1        | 70.1        | 42.5        | 37.9        | 51.5        | 55.9        | 38.8        | 61.5        | 52.6        | 42.8        | 61.3        |
| BTF (FPFH)                  | 57.9        | 54.5        | 59.3        | 58.5        | 65.1        | 71.9        | 53.1        | 52.3        | 56.8        | <u>72.1</u> | 58.8        | 56.4        | 47.9        | <u>66.2</u> |
| M3DM (CVPR 23')             | 65.2        | 47.7        | 64.2        | 57.0        | <u>75.2</u> | 62.5        | 63.2        | 62.3        | 52.8        | 62.7        | <u>63.6</u> | 45.8        | 55.5        | 46.4        |
| PatchCore (FPFH) (CVPR 22') | 45.7        | 65.5        | 72.5        | 60.4        | 58.6        | 58.4        | <u>70.1</u> | 60.1        | 52.5        | 63.0        | <u>47.5</u> | 49.4        | 49.9        | 33.2        |
| PatchCore (PointMAE)        | 58.3        | <u>72.1</u> | 54.2        | 64.2        | 71.0        | <u>80.1</u> | 51.5        | 42.3        | 63.3        | 57.1        | 49.6        | 61.1        | 46.3        | 65.2        |
| CPMF (PR 24')               | 54.1        | <u>64.5</u> | 69.7        | <u>64.7</u> | 60.9        | 54.4        | 60.2        | 61.9        | 33.3        | 50.1        | 47.7        | <u>64.5</u> | 61.8        | 65.5        |
| Reg3D-AD (NeurIPS 23')      | <u>71.1</u> | 62.3        | <u>77.0</u> | 53.1        | 63.8        | 42.4        | 53.8        | 61.7        | 60.0        | 38.1        | <b>61.8</b> | 46.8        | 60.1        | 61.4        |
| IMRNet (CVPR 24')           | 70.2        | 65.8        | 50.2        | 45.5        | 62.7        | 59.9        | <u>70.1</u> | 65.6        | 69.7        | 61.5        | 60.2        | 57.5        | <u>76.0</u> | 55.2        |
| Ours                        | <b>90.6</b> | <b>87.6</b> | <b>80.1</b> | <b>87.9</b> | <b>87.0</b> | <b>99.5</b> | <b>76.5</b> | <b>91.4</b> | <b>86.4</b> | <b>96.1</b> | <b>93.4</b> | <b>84.9</b> | <b>91.5</b> | <b>80.3</b> |

  

| Method                      | shelf0      | tap0        | tap1        | vase0       | vase1       | vase2       | vase3       | vase4       | vase5       | vase7       | vase8       | vase9       | Average     | Mean rank  |
|-----------------------------|-------------|-------------|-------------|-------------|-------------|-------------|-------------|-------------|-------------|-------------|-------------|-------------|-------------|------------|
| BTF (Raw) (CVPR 23')        | 62.4        | 53.5        | 59.4        | 56.2        | 44.1        | 41.3        | <u>71.7</u> | 42.8        | 61.5        | 54.7        | 41.6        | 48.2        | 54.9        | 6.5        |
| BTF (FPFH)                  | 61.1        | 61.0        | 57.5        | 64.1        | 65.5        | 56.9        | 65.2        | 58.7        | 47.2        | 59.2        | 62.4        | 63.8        | 59.8        | 5.3        |
| M3DM (CVPR 23')             | 66.5        | <u>72.2</u> | 63.8        | <b>78.8</b> | 65.2        | 61.5        | 55.1        | 52.6        | 63.3        | 64.8        | 46.3        | 65.1        | 60.3        | 5.1        |
| PatchCore (FPFH) (CVPR 22') | 50.4        | 71.2        | 68.4        | 64.5        | 62.3        | <u>80.1</u> | 48.1        | <u>77.7</u> | 51.5        | 62.1        | 51.5        | <u>66.0</u> | 58.8        | 5.6        |
| PatchCore (PointMAE)        | 54.3        | 71.2        | 54.2        | 54.8        | 57.2        | 71.1        | 45.5        | 58.6        | 58.5        | <u>65.2</u> | 65.5        | 63.4        | 59.5        | 5.6        |
| CPMF (PR 24')               | <b>68.1</b> | 63.9        | 69.7        | 63.2        | 64.5        | 63.2        | 58.8        | 65.5        | 51.8        | 43.2        | <u>67.3</u> | 61.8        | 59.7        | 5.1        |
| Reg3D-AD (NeurIPS 23')      | 67.5        | 67.6        | 59.9        | 61.5        | 46.8        | 64.1        | 65.1        | 50.5        | 58.8        | 45.5        | <u>62.9</u> | 57.4        | 58.4        | 5.6        |
| IMRNet (CVPR 24')           | 62.5        | 40.1        | <b>79.6</b> | 57.3        | <u>72.5</u> | 65.5        | 70.8        | 52.8        | <u>65.4</u> | 60.1        | 63.9        | 46.2        | <u>62.1</u> | <u>4.6</u> |
| Ours                        | <u>68.0</u> | <b>85.6</b> | <u>70.9</u> | <u>75.3</u> | <b>78.9</b> | <b>96.3</b> | <b>90.2</b> | <b>82.4</b> | <b>87.9</b> | <b>97.1</b> | <b>83.3</b> | <b>90.4</b> | <b>88.1</b> | <b>1.0</b> |

Table 5. Comparison of object-level AUC-PR results on the Anomaly-ShapeNet dataset.

| Method             | bag0        | bottle0     | bow10       | bucket0     | cap0        | cup0        | headset0    | jar0        | microphone0 | vase0       |
|--------------------|-------------|-------------|-------------|-------------|-------------|-------------|-------------|-------------|-------------|-------------|
| R3D-AD             | 72.0        | 73.3        | 81.9        | 68.3        | 82.2        | 77.6        | 73.8        | 83.8        | 76.2        | 78.8        |
| Ours (PTv3)        | <u>73.3</u> | <u>83.3</u> | <u>85.5</u> | <u>82.5</u> | <u>84.0</u> | <b>91.4</b> | <u>76.0</u> | <b>96.1</b> | <u>77.1</u> | <b>87.0</b> |
| Ours (MinkUNet34C) | <b>83.3</b> | <b>90.0</b> | <b>92.2</b> | <b>85.3</b> | <b>87.7</b> | <u>87.1</u> | <b>80.8</b> | <u>86.6</u> | <b>77.6</b> | <u>85.8</u> |

Table 6. Object-level AUC-ROC results vs. backbone.

| Method | ashtray0 | bag0 | bottle0 | bottle1 | bottle3 | bow10 | bow11 | bow12 | bow13 | bow14 | bow15 | bucket0 | bucket1 | cap0 |
|--------|----------|------|---------|---------|---------|-------|-------|-------|-------|-------|-------|---------|---------|------|
| Ours   | 62.5     | 55.5 | 65.3    | 41.6    | 25.0    | 57.5  | 51.3  | 69.7  | 46.1  | 74.4  | 59.2  | 5.3     | 61.6    | 79.3 |

  

| Method | cap3 | cap4 | cap5 | cup0 | cup1 | eraser0 | headset0 | headset1 | helmet0 | helmet1 | helmet2 | helmet3 | jar0 | micro. |
|--------|------|------|------|------|------|---------|----------|----------|---------|---------|---------|---------|------|--------|
| Ours   | 61.5 | 53.9 | 53.5 | 58.2 | 45.5 | 65.3    | 37.9     | 48.4     | 40.1    | 29.1    | 47.0    | 10.3    | 57.0 | 30.3   |

  

| Method | shelf0 | tap0 | tap1 | vase0 | vase1 | vase2 | vase3 | vase4 | vase5 | vase7 | vase8 | vase9 | Average |
|--------|--------|------|------|-------|-------|-------|-------|-------|-------|-------|-------|-------|---------|
| Ours   | 26.8   | 37.4 | 18.2 | 58.6  | 30.7  | 47.1  | 48.4  | 36.3  | 27.6  | 63.3  | 79.7  | 71.3  | 48.4    |

Table 7. Point-level AUC-PR results of our method on the Anomaly-ShapeNet dataset.

| Category | BTF<br>(Raw)<br>(CVPR 23’) | BTF<br>(FPFH) | M3DM<br>(CVPR 23’) | PatchCore<br>(FPFH)<br>(CVPR 22’) | PatchCore<br>(PointMAE) | Reg3D-AD<br>(NeurIPS 23’) | Group3AD<br>(MM 24’) | R3D-AD<br>(ECCV 24’) | Ours |
|----------|----------------------------|---------------|--------------------|-----------------------------------|-------------------------|---------------------------|----------------------|----------------------|------|
| Airplane | 73.8                       | 56.4          | 53.0               | 47.1                              | 57.9                    | 63.1                      | 63.6                 | -                    | 71.5 |
| Car      | 70.8                       | 64.7          | 60.7               | 64.3                              | 61.0                    | 71.8                      | 74.5                 | -                    | 57.4 |
| Candy    | 86.4                       | 73.5          | 68.3               | 63.7                              | 63.5                    | 72.4                      | 73.8                 | -                    | 76.3 |
| Chicken  | 69.3                       | 60.8          | 73.5               | 61.8                              | 68.3                    | 67.6                      | 75.9                 | -                    | 56.3 |
| Diamond  | 88.2                       | 56.3          | 61.8               | 76.0                              | 77.6                    | 83.5                      | 86.2                 | -                    | 61.4 |
| Duck     | 87.5                       | 60.1          | 67.8               | 43.0                              | 43.9                    | 50.3                      | 63.1                 | -                    | 64.4 |
| Fish     | 70.9                       | 51.4          | 60.0               | 46.4                              | 71.4                    | 82.6                      | 83.6                 | -                    | 87.7 |
| Gemstone | 89.1                       | 59.7          | 65.4               | 83.0                              | 51.4                    | 54.5                      | 56.4                 | -                    | 53.0 |
| Seahorse | 51.2                       | 52.0          | 56.1               | 54.4                              | 66.0                    | 81.7                      | 82.7                 | -                    | 58.5 |
| Shell    | 57.1                       | 48.9          | 74.8               | 59.6                              | 72.5                    | 81.1                      | 79.8                 | -                    | 54.2 |
| Starfish | 50.1                       | 39.2          | 55.5               | 52.2                              | 64.1                    | 61.7                      | 62.5                 | -                    | 65.9 |
| Toffees  | 81.5                       | 62.3          | 67.9               | 41.1                              | 72.7                    | 75.9                      | 80.3                 | -                    | 72.9 |
| Average  | 72.9                       | 57.1          | 63.7               | 57.7                              | 64.1                    | 70.5                      | 73.5                 | 59.2                 | 65.0 |

Table 8. Comparison of point-level AUC-ROC results on the Real3D-AD dataset.

| Method                                     | ashtray0 | bag0 | bottle0 | bottle1 | bottle3 | bow10 | bow11 | bow12 | bow13 | bow14 | bow15 | bucket0 | bucket1 | cap0 |
|--------------------------------------------|----------|------|---------|---------|---------|-------|-------|-------|-------|-------|-------|---------|---------|------|
| <i>w/o <math>\mathcal{L}_{dir}</math></i>  | 55.2     | 41.4 | 50.9    | 57.1    | 62.8    | 66.6  | 44.8  | 50.0  | 44.8  | 41.4  | 55.7  | 59.0    | 41.9    | 38.5 |
| <i>w/o <math>\mathcal{L}_{dist}</math></i> | 94.7     | 65.2 | 63.3    | 83.1    | 83.4    | 72.9  | 68.1  | 64.4  | 55.1  | 71.4  | 68.0  | 70.4    | 67.6    | 82.5 |
| <i>w/o normal vector</i>                   | 99.5     | 61.4 | 84.2    | 85.6    | 88.2    | 96.2  | 75.5  | 81.1  | 88.5  | 90.3  | 76.6  | 81.5    | 76.5    | 90.7 |
| Ours                                       | 100.0    | 83.3 | 90.0    | 93.3    | 92.6    | 92.2  | 82.9  | 83.3  | 88.1  | 98.1  | 84.9  | 85.3    | 78.7    | 87.7 |

  

| Method                                     | cap3 | cap4 | cap5 | cup0 | cup1 | eraser0 | headset0 | headset1 | helmet0 | helmet1 | helmet2 | helmet3 | jar0 | micro. |
|--------------------------------------------|------|------|------|------|------|---------|----------|----------|---------|---------|---------|---------|------|--------|
| <i>w/o <math>\mathcal{L}_{dir}</math></i>  | 49.8 | 51.5 | 58.5 | 52.3 | 49.0 | 50.9    | 49.3     | 48.5     | 50.1    | 48.0    | 33.0    | 48.7    | 48.0 | 47.6   |
| <i>w/o <math>\mathcal{L}_{dist}</math></i> | 77.8 | 61.4 | 61.4 | 62.3 | 63.8 | 65.2    | 66.2     | 89.0     | 58.5    | 78.0    | 66.6    | 70.0    | 83.3 | 60.9   |
| <i>w/o normal vector</i>                   | 90.5 | 74.3 | 70.1 | 82.8 | 64.2 | 91.9    | 77.3     | 94.7     | 65.2    | 95.7    | 85.2    | 75.1    | 79.0 | 78.5   |
| Ours                                       | 85.9 | 79.2 | 67.0 | 87.1 | 83.3 | 99.5    | 80.8     | 92.3     | 76.2    | 96.1    | 86.9    | 75.4    | 86.6 | 77.6   |

  

| Method                                     | shelf0 | tap0 | tap1 | vase0 | vase1 | vase2 | vase3 | vase4 | vase5 | vase7 | vase8 | vase9 | Average |
|--------------------------------------------|--------|------|------|-------|-------|-------|-------|-------|-------|-------|-------|-------|---------|
| <i>w/o <math>\mathcal{L}_{dir}</math></i>  | 51.3   | 48.1 | 47.0 | 45.4  | 50.0  | 51.9  | 55.7  | 53.3  | 51.9  | 42.3  | 48.1  | 58.4  | 49.9    |
| <i>w/o <math>\mathcal{L}_{dist}</math></i> | 42.8   | 56.3 | 57.4 | 68.7  | 63.3  | 68.5  | 54.5  | 69.3  | 68.5  | 87.1  | 70.6  | 69.6  | 68.7    |
| <i>w/o normal vector</i>                   | 70.4   | 73.6 | 57.7 | 85.4  | 63.8  | 77.1  | 80.9  | 64.8  | 53.8  | 92.3  | 77.8  | 84.8  | 79.5    |
| Ours                                       | 57.3   | 74.5 | 68.1 | 85.8  | 74.2  | 95.2  | 82.1  | 67.5  | 85.2  | 96.6  | 73.9  | 83.0  | 83.9    |

Table 9. Ablation study on the Anomaly-ShapeNet dataset (object-level AUC-ROC).
